# Supplementary material for: Multi-tissue transcriptomics of the black widow spider reveals expansions, co-options, and functional processes of the silk gland gene toolkit
Source: PubMed Central journal article supplement (PMC4200122; doi:10.1186/1471-2164-15-365), 2014-06-11
Supplement: 12864_2013_6107_MOESM1_ESM.pdf [file 12864_2013_6107_MOESM1_ESM.pdf]

## Supplementary Methods

### *de novo* transcript assembly

Transcripts were *de novo* assembled using Velvet-Oases [1] and Trinity [2]. Velvet [3] is intended to assemble whole genomes and the algorithm expects equal sequencing read depth across the entire assembly, though mRNA abundance can vary widely. In addition multiple transcripts (isoforms) can be generated from a single locus. Oases [1] attempts to assemble all isoforms and deals with unequal read depth. Trinity is a stand along package built for *de novo* assembly of mRNA-sequencing data.

Each tissue-specific library was assembled separately. Velvet-Oases was run with multiple k-mers ranging from 29-61 in increments of 4 using the Oases supplied Python script. The multiple runs were merged with the Oases `-merge` option. Because Velvet-Oases generated 30 – 400 thousand transcripts depending on library, a single “transcript” per “locus” was chosen using the `oases-to-csv` python script [4]. Trinity was run with default parameters using a single k-mer of 25.

To generate the most complete possible set of *L. hesperus* transcripts we combined tissue-specific assemblies using CAP3 [5]. We first ran CAP3 [5] using default parameters on each Trinity-derived tissue specific assembly and labeled the resulting combined sequences (or contigs) and singletons according to tissue type. We then concatenated all six files (tissue-specific contigs and tissue specific singletons) and again ran CAP3 with default parameters. For Velvet-Oases derived assemblies, we chose the “best” transcript for each “locus” using the `oases-to-csv` python script [4] for each tissue-specific assembly. We then ran CAP3 with default parameters on three concatenated “best transcript” files. Contigs generated among libraries do not retain any tissue-specific labeling. We predicted open read frames (ORFs) for each of the resulting assembled transcripts from both programs using GetOrf [6] and retained only those that were predicted to encode at least 30 amino acids. We compared the quality and completeness of the Trinity-derived transcriptome to the Velvet-Oases derived transcriptome by comparison to previously described proteins, according to methods described in the main document.

## Results

### Trinity derived transcriptome out performs Velvet-Oases

We generated over 149 million high quality 75 or 100 bp paired-end sequence reads from genes expressed (cDNAs) in three tissues of adult female black widows, silk glands, venom glands and cephalothoraxes (Additional File 1, Table S1). *de novo* assembly of each tissue-specific library resulted in 19-450 thousand transcripts depending on assembly method and tissue type (Additional File 1, Table S2). These transcripts were grouped into “loci” or “components” by Velvet-Oases [1] and Trinity [2], respectively. “Loci” and “components” have similar underlying mathematical definitions and are typically interpreted as representing the same genomic locus. Multiple transcripts (e.g. isoforms) can be generated from a single locus. Trinity assemblies resulted in more loci (16.8-72.1 thousand) than Velvet-Oases (10.6-36.5 thousand), but fewer total transcripts (Additional File 1, Table S1; Trinity: 19.3-114.4 thousand, Velvet-Oases: 36.7-426.7 thousand). Due to the large numbers of transcripts generated by Velvet-Oases, we used a single transcript per locus for combining the tissue-specific assemblies into a putative transcriptome using CAP3. We retained all transcripts for combining tissue-specific assemblies into a Trinity derived transcriptome.

The Trinity derived assembly was more complete than the Velvet-Oases derived assembly in terms of possessing more homologs to a number of sets of previously described sequences. For instance, the Trinity derived transcriptome included complete homologs of 99% of the Core Eukaryotic Genes (CEGs), while Velvet-Oases recovered 90% of CEGs, as determined by CEGMA [7]. The Trinity derived transcriptome also possessed homologs of more unique tick and fruitfly RefSeq proteins than did Velvet-Oases assessed by significant BLASTX alignments (E-score < 1e-5; Table S2). Importantly, the Trinity derived transcriptome recovered 99% of 999 previously described non-redundant *L. hesperus* cDNA and genomic sequences while the Velvet-Oases transcriptome only recovered 88% (Additional File 1, Table S2). Finally, using BLASTX alignments to tick proteins, we found fewer potential cases of chimeric “assembled sequences” in the Trinity derived transcriptome than the Velvet-Oases derived one. Specifically, 11.2% of Trinity derived assembled transcripts had non-overlapping alignments to two different fruit fly proteins versus 13% of Velvet-Oases derived ones (E-score < 1e-10). Using more stringent alignments (E-score < 1e-50), only 4.9% and 6.7% of assembled transcripts were potentially chimeric in the Trinity and Velvet-Oases derived transcriptomes, respectively.

### References

1. Schulz MH, Zerbino DR, Vingron M, Birney E: **Oases: robust *de novo* RNA-Seq assembly across the dynamic range of expression levels.** *Bioinformatics* 2012, **28**(8):1086-92.
2. Grabherr MG, Haas BJ, Yassour M, Levin JZ, Thompson DA, Amit I, Adiconis X, Fan L, Raychowdhury R, Zeng Q, Chen Z, Mauceli E, Hacohen N, Gnirke A, Rhind N, di Palma F, Birren BW, Nusbaum C, Lindblad-Toh K, Friedman N, Regev A: **Full-length transcriptome assembly from RNA-Seq data without a reference genome.** *Nat Biotechnol* 2011, **29**(7):644-52.
3. Zerbino DR, Birney E: **Velvet: algorithms for *de novo* short read assembly using de Bruijn graphs.** *Genome Res* 2008, **18**(5):821-9.
4. **Oasis to CSV** [<https://code.google.com/p/oases-to-csv/>]
5. Huang X, Madan A: **CAP3: A DNA sequence assembly program.** *Genome Res* 1999, **9**(9):868-877.
6. **EMBOSS GetOrf** [<http://emboss.sourceforge.net/apps/cvs/emboss/apps/getorf.html>]
7. Parra G, Bradnam K, Korf I: **CEGMA: a pipeline to accurately annotate core genes in eukaryotic genomes.** *Bioinformatics* 2007, **23**(9):1061-7.

## Supplementary Tables for Additional File 1

| Table S1. Summary stats of Trinity (T) and Velvet-Oases (O) assemblies. |                 |                             |       |      |      |      |      |      |      |     |     |     |      |                                  |                                |
|-------------------------------------------------------------------------|-----------------|-----------------------------|-------|------|------|------|------|------|------|-----|-----|-----|------|----------------------------------|--------------------------------|
|                                                                         |                 | Loci with Transcript Number |       |      |      |      |      |      |      |     |     |     |      | # components / Total transcripts | Contigs/ Singletons after CAP3 |
|                                                                         | PE <sup>a</sup> |                             | 1     | 2    | 3    | 4    | 5    | 6    | 7    | 8   | 9   | 10  | >10  |                                  |                                |
| Silk                                                                    | 17.1            | T                           | 15588 | 900  | 143  | 108  | 43   | 22   | 10   | 7   | 5   | 9   | 26   | 16835/<br>19306                  | 1068/<br>16833                 |
|                                                                         |                 | O                           | 6491  | 916  | 692  | 449  | 363  | 325  | 230  | 206 | 169 | 129 | 624  | 10594/<br>36658                  | NA                             |
| Ceph                                                                    | 67.8            | T                           | 57650 | 7308 | 2925 | 1658 | 883  | 660  | 411  | 308 | 208 | 167 | 584  | 72178/<br>114418                 | 13942/<br>77677                |
|                                                                         |                 | O                           | 16730 | 3450 | 2172 | 1611 | 1421 | 1236 | 1040 | 982 | 994 | 718 | 6168 | 36522/<br>426672                 | NA                             |
| Venom                                                                   | 53.7            | T                           | 39305 | 5780 | 2506 | 1476 | 831  | 567  | 345  | 221 | 179 | 126 | 416  | 51336/<br>85173                  | 11616/<br>54782                |
|                                                                         |                 | O                           | 16277 | 2495 | 1774 | 1305 | 1112 | 979  | 778  | 786 | 701 | 655 | 5516 | 32378/<br>292812                 | NA                             |

<sup>a</sup>Millions of processed paired-end reads used for *de novo* assemblies.

| <b>Table S2.</b> Comparison of <i>de novo</i> assembly methods for black widow RNA-seq reads from silk glands, cephalothoraxes, and venom glands. |                      |                           |
|---------------------------------------------------------------------------------------------------------------------------------------------------|----------------------|---------------------------|
|                                                                                                                                                   | <sup>a</sup> Trinity | <sup>a</sup> Velvet-Oases |
| # assembled transcripts (ATs)                                                                                                                     | 103,635              | 53,644                    |
| N50                                                                                                                                               | 1554                 | 1437                      |
| N90                                                                                                                                               | 273                  | 316                       |
| <sup>b</sup> # ATs that aligned to fruit fly, BLASTX 10 <sup>-05</sup>                                                                            | 19374                | 7241                      |
| <sup>b</sup> # ATs that aligned to fruit fly, BLASTX 10 <sup>-50</sup>                                                                            | 8793                 | 5880                      |
| <sup>c</sup> # ATs that aligned to tick, BLASTX 10 <sup>-03</sup>                                                                                 | 24,584               | 15,493                    |
| <sup>c</sup> # ATs that aligned to tick, BLASTX 10 <sup>-50</sup>                                                                                 | 9513                 | 5779                      |
| <sup>d</sup> # unique tick proteins aligned to AT, BLASTX 10 <sup>-05</sup>                                                                       | 7900                 | 7241                      |
| <sup>d</sup> # unique tick proteins aligned to AT, BLASTX 10 <sup>-50</sup>                                                                       | 4257                 | 3876                      |
|                                                                                                                                                   |                      |                           |
| <sup>e</sup> Potential Chimerics (BLASTX 10 <sup>-10</sup> )                                                                                      | 11.2%                | 13.0%                     |
| <sup>e</sup> Potential Chimerics (BLASTX 10 <sup>-50</sup> )                                                                                      | 4.9%                 | 6.7%                      |
|                                                                                                                                                   |                      |                           |
| <sup>f</sup> CEGMA % complete                                                                                                                     | 98%                  | 90%                       |
| <sup>f</sup> CEGMA % partial                                                                                                                      | 99%                  | 96%                       |
| <sup>f</sup> average number of complete homologs per CEG                                                                                          | 2.06                 | 2.01                      |
| <sup>f</sup> percentage of detected CEGs that have more than 1 homolog                                                                            | 52                   | 58                        |
| <sup>f</sup> total number of CEGs present including putative paralogs                                                                             | 501                  | 446                       |
|                                                                                                                                                   |                      |                           |
| <sup>g</sup> Proportion of previously described black widow cDNAs and genes that aligned to an AT, BLASTN e <sup>-50</sup>                        | 99%                  | 88%                       |

<sup>a</sup>Assemblies were performed on three tissue-specific libraries separately and then combined using CAP3.

<sup>b</sup>Fruit fly, *Drosophila melanogaster*, proteins were from the reference sequences (RefSeq) available in NCBI as of July 2012.

<sup>c</sup>Tick, *Ixodes scapularis*, proteins were from the reference sequences (RefSeq) available in NCBI as of July 2012. *I. scapularis* is the closest relative to spiders with a sequenced genome.

<sup>d</sup>Only one tick protein with significant BLASTX alignment was retained per AT.

<sup>e</sup>Proportion of ATs that align to fly proteins, that aligned to more than one fly protein without overlap.

<sup>f</sup>CEGMA represents a database of Core Eukaryotic Genes that are conserved in all eukaryotes and should be expressed in all tissues [7].

<sup>g</sup>Black widow cDNAs and genes were compiled from GenBank and our personal databases. A non-redundant set of 999 sequences was constructed with CAP3.
