# Supplementary material for: Multi-tissue transcriptomics of the black widow spider reveals expansions, co-options, and functional processes of the silk gland gene toolkit
Source: PubMed Central journal article supplement (PMC4200122; doi:10.1186/1471-2164-15-365), 2014-06-11
Supplement: 12864_2013_6107_MOESM2_ESM.pdf [file 12864_2013_6107_MOESM2_ESM.pdf]

**SUPPLEMENTARY TABLES**

| <b>Supplementary Table S1.</b> Proportion of raw sequencing reads that aligned to the assembled transcripts (ATs) in the Trinity derived transcriptome before and after removing redundant amino acid sequences (unique assembled transcripts, UATs) from each tissue type. |                          |                  |
|-----------------------------------------------------------------------------------------------------------------------------------------------------------------------------------------------------------------------------------------------------------------------------|--------------------------|------------------|
| Library                                                                                                                                                                                                                                                                     | % Mapped to Original ATs | % Mapped to UATs |
| Cephalothorax                                                                                                                                                                                                                                                               | 80.30%                   | 73.85%           |
| Silk glands                                                                                                                                                                                                                                                                 | 84.96%                   | 86.24%           |
| Venom glands                                                                                                                                                                                                                                                                | 85.95%                   | 81.32%           |

| <b>Supplementary Table S2.</b> Observed versus expected evolutionary shifts for black widow assembled transcripts between generally expressed (non-Silk) and silk-specific expression (Silk). |                   |                    |                                        |                                        |                                        |                                        |
|-----------------------------------------------------------------------------------------------------------------------------------------------------------------------------------------------|-------------------|--------------------|----------------------------------------|----------------------------------------|----------------------------------------|----------------------------------------|
| Family ID <sup>a</sup>                                                                                                                                                                        | SSTs <sup>b</sup> | nSSTs <sup>c</sup> | Observed non-Silk to Silk <sup>d</sup> | Expected non-Silk to Silk <sup>e</sup> | Observed Silk to non-Silk <sup>d</sup> | Expected Silk to non-Silk <sup>e</sup> |
| 1                                                                                                                                                                                             | 5                 | 40                 | 5                                      | 4.75+0.44                              | 2                                      | 2.86+1.14                              |
| 2                                                                                                                                                                                             | 2                 | 35                 | 2                                      | 1.96+0.20                              | 0                                      | 1.12+0.73                              |
| 3                                                                                                                                                                                             | 27                | 2                  | 2                                      | 1.12+0.82                              | 2                                      | 1.91+0.29                              |
| 4                                                                                                                                                                                             | 3                 | 26                 | 2                                      | 2.86+0.38                              | 0                                      | 1.61+0.97                              |
| 6                                                                                                                                                                                             | 9                 | 20                 | 7                                      | 6.80+1.37                              | 3                                      | 5.17+2.27                              |
| 7                                                                                                                                                                                             | 13                | 15                 | 2                                      | 7.90+2.73                              | 6                                      | 5.98+2.33                              |
| 9                                                                                                                                                                                             | 13                | 9                  | 0                                      | 6.95+2.77                              | 3                                      | 4.89+1.52                              |
| 10                                                                                                                                                                                            | 2                 | 20                 | 2                                      | 1.94+0.24                              | 0                                      | 1.15+0.76                              |
| 11                                                                                                                                                                                            | 2                 | 19                 | 2                                      | 1.95+0.22                              | 2                                      | 1.11+0.67                              |
| 12                                                                                                                                                                                            | 13                | 8                  | 0                                      | 5.64+2.76                              | 3                                      | 4.87+1.52                              |
| 13                                                                                                                                                                                            | 4                 | 16                 | 3                                      | 3.42+0.67                              | 0                                      | 2.53+1.32                              |
| 14                                                                                                                                                                                            | 3                 | 15                 | 2                                      | 2.69+0.54                              | 1                                      | 1.85+1.08                              |
| 15                                                                                                                                                                                            | 11                | 7                  | 8                                      | 5.17+2.51                              | 4                                      | 4.05+1.51                              |
| 16                                                                                                                                                                                            | 14                | 3                  | 2                                      | 2.22+2.17                              | 3                                      | 2.71+0.59                              |
| 17                                                                                                                                                                                            | 4                 | 12                 | 1                                      | 3.26+0.85                              | 3                                      | 2.20+1.46                              |
| 21                                                                                                                                                                                            | 2                 | 11                 | 1                                      | 1.89+0.31                              | 3                                      | 1.03+0.76                              |
| 26                                                                                                                                                                                            | 5                 | 6                  | 0                                      | 3.07+1.30                              | 3                                      | 2.64+1.34                              |
| 27                                                                                                                                                                                            | 5                 | 5                  | 3                                      | 2.60+1.26                              | 5                                      | 2.24+1.17                              |
| 28                                                                                                                                                                                            | 5                 | 5                  | 1                                      | 2.75+1.23                              | 1                                      | 2.06+1.13                              |
| 33                                                                                                                                                                                            | 3                 | 6                  | 3                                      | 2.30+0.77                              | 0                                      | 1.72+1.11                              |
| 35                                                                                                                                                                                            | 2                 | 6                  | 2                                      | 1.66+0.50                              | 0                                      | 1.28+0.87                              |
| 37                                                                                                                                                                                            | 2                 | 5                  | 0                                      | 1.40+0.67                              | 4                                      | 1.31+0.93                              |

|     |      |      |      |           |      |           |
|-----|------|------|------|-----------|------|-----------|
| 38  | 3    | 4    | 1    | 1.92+0.88 | 0    | 1.57+0.92 |
| 40  | 4    | 3    | 0    | 2.00+1.09 | 2    | 1.65+0.86 |
| 47  | 2    | 4    | 2    | 1.37+0.68 | 0    | 1.29+0.77 |
| 51  | 4    | 2    | 2    | 1.39+0.97 | 2    | 1.31+0.69 |
| 52  | 2    | 4    | 0    | 1.37+0.66 | 2    | 1.24+0.83 |
| 53  | 2    | 3    | 1    | 1.29+0.73 | 0    | 1.20+0.82 |
| 55  | 3    | 2    | 0    | 1.29+0.95 | 2    | 1.18+0.67 |
| 56  | 3    | 2    | 0    | 1.17+0.92 | 2    | 1.18+0.74 |
| 59  | 2    | 3    | 2    | 1.26+0.71 | 0    | 1.12+0.78 |
| 63  | 2    | 3    | 0    | 1.34+0.68 | 2    | 1.03+0.78 |
| 76  | 2    | 2    | 2    | 1.15+0.70 | 1    | 0.86+0.71 |
| 82  | 2    | 2    | 2    | 1.02+0.70 | 1    | 0.94+0.72 |
| 83  | 2    | 2    | 0    | 1.06+0.71 | 2    | 0.96+0.70 |
|     |      |      |      |           |      |           |
| AVG | 3.85 | 9.34 | 1.77 | 2.62+1.00 | 1.82 | 2.05+1.01 |

<sup>a</sup>Family IDs were assigned to clusters generated with BLASTCLUST (see main document).

<sup>b</sup>silk gland-specific transcripts using the 2.5% tail cutoff (see Additional File 1, Figure S1)

<sup>c</sup>non-silk gland-specific transcripts using the 2.5% tail cutoff

<sup>d</sup>Observed state switches within the PhyML gene tree, with the interior nodes annotated as either silk-specific or not silk-specific using discrete ML ancestral state reconstruction.

<sup>e</sup>Mean and standard deviation of the expected state switches within 100 random phylogenetic gene trees, with the interior nodes annotated as either silk-specific or not silk-specific using discrete ML ancestral state reconstruction.

| <b>Supplementary Table S3.</b> Black widow unique assembled transcripts (UATs) with best BLASTX hit to <i>Nephila clavipes</i> Aggregate Spider Glue 1 (GenBank:AC141238.1). |                   |                |                    |           |            |          |
|------------------------------------------------------------------------------------------------------------------------------------------------------------------------------|-------------------|----------------|--------------------|-----------|------------|----------|
| UAT                                                                                                                                                                          | Transcript Length | Protein Length | Cephalothorax eCPM | Silk eCPM | Venom eCPM | E-Score  |
| Contig26361                                                                                                                                                                  | 1666              | 377            | 27.63              | 0.00      | 0.08       | 8.00E-40 |
| Contig21981                                                                                                                                                                  | 436               | 139            | 0.60               | 0.00      | 0.13       | 3.00E-22 |
| silk_Contig684                                                                                                                                                               | 469               | 126            | 5.28               | 2.99      | 0.00       | 1.00E-22 |
| Contig26359                                                                                                                                                                  | 1777              | 413            | 41.59              | 7.79      | 0.16       | 3.00E-39 |
| ceph_comp63067_c0_seq1                                                                                                                                                       | 234               | 77             | 0.00               | 0.00      | 0.00       | 6.00E-11 |
| silk_Contig682                                                                                                                                                               | 1240              | 383            | 44.53              | 14.64     | 0.32       | 3.00E-45 |
| Contig26360                                                                                                                                                                  | 1702              | 389            | 0.07               | 0.00      | 0.00       | 9.00E-40 |
| Contig12095                                                                                                                                                                  | 1178              | 322            | 4.16               | 1.64      | 0.10       | 3.00E-18 |
| Contig21628                                                                                                                                                                  | 512               | 157            | 0.26               | 1.56      | 0.00       | 1.00E-06 |
| ceph_comp63067_c1_seq1                                                                                                                                                       | 320               | 106            | 0.00               | 0.09      | 0.00       | 9.00E-17 |
| ceph_comp92413_c0_seq6                                                                                                                                                       | 1465              | 310            | 3.00               | 0.00      | 0.17       | 2.00E-34 |
| Contig10398                                                                                                                                                                  | 1064              | 348            | 0.36               | 1.90      | 0.18       | 9.00E-17 |
| ceph_comp92413_c0_seq5                                                                                                                                                       | 1501              | 322            | 120.21             | 0.00      | 0.00       | 2.00E-34 |
| Contig26362                                                                                                                                                                  | 1573              | 346            | 29.69              | 1.59      | 1.22       | 5.00E-40 |

| <b>Supplementary Table S4.</b> Black widow unique assembled transcripts (UATs) with best BLASTX hit to <i>Latrodectus hesperus</i> Aggregate gland Silk Factor 1 (GenBank:AFP57565.1) |                   |                |           |           |            |         |
|---------------------------------------------------------------------------------------------------------------------------------------------------------------------------------------|-------------------|----------------|-----------|-----------|------------|---------|
| UAT                                                                                                                                                                                   | Transcript Length | Protein Length | Ceph eCPM | Silk eCPM | Venom eCPM | E-Score |
| silk_Contig525                                                                                                                                                                        | 1102              | 367            | 5.0       | 100412.9  | 2.0        | 5E-74   |
| silk_comp17078_c1_seq1                                                                                                                                                                | 436               | 98             | 0         | 19859.7   | 0          | 1E-22   |
| Contig17258                                                                                                                                                                           | 478               | 159            | 3.0       | 358949.9  | 2.0        | 5E-19   |
| silk_Contig646                                                                                                                                                                        | 375               | 124            | 0         | 30987.6   | 0          | 1E-07   |
| Contig13471                                                                                                                                                                           | 2670              | 763            | 510.0     | 15.0      | 84.0       | 5E-07   |
| silk_Contig644                                                                                                                                                                        | 955               | 135            | 0         | 74294.7   | 0          | 3E-04   |
| silk_Contig643                                                                                                                                                                        | 733               | 85             | 0         | 48653.4   | 0          | 4E-04   |

| <b>Supplementary Table S5.</b> Black widow unique assembled transcripts (UATs) with best BLASTX hits to published spidroin N or C-terminal regions. |                       |                 |                          |                                  |
|-----------------------------------------------------------------------------------------------------------------------------------------------------|-----------------------|-----------------|--------------------------|----------------------------------|
| UAT                                                                                                                                                 | Spidroin <sup>a</sup> | Terminal Region | Repeat Size <sup>b</sup> | Nucleotide Identity <sup>c</sup> |
| Lhsilk_Contig1000                                                                                                                                   | Flag                  | C               | 279                      | NA                               |
| silk_comp16631_c0_seq2                                                                                                                              | MaSp1                 | C               | 45                       | 99%                              |
| C_Lh_Contig384                                                                                                                                      | MaSp1                 | C               | 45                       | 96%                              |
| Lhsilk_comp17907_c0_seq1                                                                                                                            | MaSp2                 | C               | 80                       | 99%                              |
| Lhsilk_comp15685_c0_seq1                                                                                                                            | MaSp1                 | C               | 226                      | 77%                              |
| Lhsilk_comp17612_c0_seq2                                                                                                                            | MiSp                  | C               | 136                      | 100%                             |
| Lhsilk_comp17612_c0_seq1                                                                                                                            | MiSp                  | C               | 179                      | 85%                              |
| LhContig1319                                                                                                                                        | TuSp1                 | C               | 251                      | 98%                              |
| C_LhContig301                                                                                                                                       | AcSp1                 | C               | 674                      | 99%                              |
| C_LhContig48                                                                                                                                        | PySp                  | C               | 286                      | 97%                              |
| C_Lhsilk_comp12682_c1_seq1                                                                                                                          | MaSp1                 | N               | 39                       | 74%                              |
| C_Lhsilk_Contig691                                                                                                                                  | MaSp1                 | N               | 87                       | 99%                              |
| C_Lhsilk_comp10331_c0_seq1                                                                                                                          | MaSp1                 | N               | 16                       | 99%                              |
| Lhsilk_comp8200_c0_seq1                                                                                                                             | AcSp1                 | N               | 27                       | 100%                             |
| Lhsilk_comp18043_c0_seq1                                                                                                                            | TuSp1                 | N               | 136                      | 99%                              |
| Lhsilk_comp15188_c0_seq1                                                                                                                            | MaSp2                 | N               | 0                        | 100%                             |
| Lhsilk_Contig933                                                                                                                                    | MiSp                  | N               | 140                      | 97%                              |
| Lhsilk_comp15188_c1_seq1                                                                                                                            | MaSp2                 | N               | 78                       | 100%                             |
| LhContig499                                                                                                                                         | Flag                  | N               | 479 <sup>d</sup>         | NA                               |
| Lhsilk_comp10420_c1_seq1                                                                                                                            | Flag                  | N               | 19                       | NA                               |

<sup>a</sup>Spidroin determined by lowest BLASTX E-score to all published spidroin sequences.  
<sup>b</sup>Number of amino acids outside the published terminal regions in [1, 2].  
<sup>c</sup>to most similar published *L. hesperus* spidroin encoding gene.  
<sup>d</sup>Sequence terminated in stop codon.

## References

1. Garb JE, Ayoub NA, Hayashi CY: **Untangling spider silk evolution with spidroin terminal domains.** *BMC evolutionary biology* 2010, **10**(1):243-243.
2. Ayoub NA, Garb JE, Kuelbs A, Hayashi CY: **Ancient properties of spider silks revealed by the complete gene sequence of the prey-wrapping silk protein (AcSp1).** *Mol Biol Evol* 2013, **30**(3):589-601.
